# Supplementary material for: Process-based modeling framework for sustainable irrigation management at the regional scale: Integrating rice production, water use, and greenhouse gas emissions
Source: Copernicus journal article supplement (doi:10.5194/gmd-2024-212), 2024-12-19
Supplement: Supplementary file 1 [file gmd-2024-212-supplement.pdf]

## Supplementary Information

### Supplementary Tables

**Table S1** Effect of non-continuous flooding irrigation on leaf area index ( $R^{LAI}$ ) under different levels of the lowest threshold of soil water potential (SWP) at different relative growth stages (RDS).

**Table S2** Effect of non-continuous flooding irrigation on net photosynthetic rate ( $R^{Pn}$ ) under different levels of the lowest threshold of soil water potential (SWP) at different relative growth stages (RDS).

**Table S3** Effect of non-continuous flooding irrigation on harvest index ( $R^{HI}$ ) under different levels of the lowest threshold of soil water potential.

**Table S4** Scenario designs of the simulation experiments to isolate contribution of each physiological functions to  $\Delta$ Yield.

**Table S5** Genetic parameters for 51 rice cultivars.

### Supplementary Figures

**Figure S1** Effects of non-continuous flooding on (a) leaf area index, (b) net photosynthetic rate and (c) harvest index based on experimental observations.

**Figure S2** Model performance in simulating spatial pattern of (a) rice yield, (b) irrigation water use, (c) methane and (d) nitrous oxide emissions under continuous flooding (baseline).

**Figure S3** Spatial pattern of model parameters under continuous flooding for the major and second rice growing season.

**Figure S4** Parameter transfer functions for upscaling model parameters.

**Figure S5** Model performance in simulating rice yield (a-b) and irrigation water use (b and d) based on the origin (a, c) and modified (b, d) WHCNS model.

**Figure S6** Model performance in simulating cultivar differences in  $\Delta$ Yield before (a) and after (b) model modification.

**Figure S7** Contribution of physiological processes to  $\Delta$ Yield and relationship with predictors.

**Figure S8** Scenario simulations and comparison with observations.

**Figure S9** Spatial pattern of NCF benefits under four optimization targets based on the origin and modified model.

**Figure S10** Spatial pattern of lower irrigation threshold under four optimization targets based on the origin and modified model.

**Table S1 Effect of non-continuous flooding irrigation on leaf area index ( $R^{LAI}$ ) under different levels of the lowest threshold of soil water potential (SWP) at different relative growth stages (RDS).** The effect values in the table was mean values of observations under correspond SWP and RDS levels (see figure S1a). Effects under other SWP and RDS levels was determined by bilinear interpolation.

| RDS              | Soil water potential (kpa) |       |       |       |       |       |       |       |       |       |       |       |
|------------------|----------------------------|-------|-------|-------|-------|-------|-------|-------|-------|-------|-------|-------|
|                  | -100                       | -60   | -50   | -40   | -30   | -25   | -20   | -15   | -10   | -5    | 0     |       |
| 0 (Planting)     | 0.000                      | 1.000 | 1.000 | 1.000 | 1.000 | 1.000 | 1.000 | 1.000 | 1.000 | 1.000 | 1.000 | 1.000 |
| 0.20 (Tillering) | 0.000                      | 0.976 | 0.976 | 0.976 | 0.976 | 0.976 | 0.976 | 0.976 | 0.976 | 0.976 | 0.976 | 1.000 |
| 0.40 (Booting)   | 0.000                      | 0.563 | 0.667 | 0.745 | 0.836 | 0.869 | 0.902 | 0.963 | 0.961 | 1.138 | 1.000 | 1.000 |
| 0.55 (Heading)   | 0.000                      | 0.689 | 0.799 | 0.879 | 0.890 | 1.015 | 0.955 | 1.018 | 0.986 | 1.028 | 1.000 | 1.000 |
| 1 (Maturity)     | 0.000                      | 0.529 | 0.621 | 0.792 | 0.859 | 0.910 | 0.962 | 1.275 | 1.282 | 1.191 | 1.000 | 1.000 |



**Table S3 Effect of non-continuous flooding irrigation on harvest index ( $R^{HI}$ ) under different levels of the lowest threshold of soil water potential.** Effects under other SWP levels was determined by linear interpolation. The effect values in the table was mean values of observations under correspond SWP level (see figure S1c). Effects under other SWP levels was determined by linear interpolation.

| <b>Soil water potential (kpa)</b> | -1500 | -60   | -50   | -40   | -30   | 0     |
|-----------------------------------|-------|-------|-------|-------|-------|-------|
| Factor                            | 0.755 | 0.755 | 0.872 | 0.939 | 1.025 | 1.000 |

**Table S4 Scenario designs of the simulation experiments to isolate contribution of each physiological functions to  $\Delta$ Yield.**

| <b>Scenario</b> | <b>f<sub>LAI</sub></b> | <b>f<sub>Pn</sub></b> | <b>f<sub>HI</sub></b> | <b>Contribution</b>                                                      |
|-----------------|------------------------|-----------------------|-----------------------|--------------------------------------------------------------------------|
| S1              | Yes                    | Yes                   | Yes                   | /                                                                        |
| S2              | No                     | Yes                   | Yes                   | $\Delta$ Yield <sup>LAI</sup> = $\Delta$ Yield (S1)- $\Delta$ Yield (S2) |
| S3              | Yes                    | No                    | Yes                   | $\Delta$ Yield <sup>Pn</sup> = $\Delta$ Yield (S1)- $\Delta$ Yield (S3)  |
| S4              | Yes                    | Yes                   | No                    | $\Delta$ Yield <sup>HI</sup> = $\Delta$ Yield (S1)- $\Delta$ Yield (S4)  |

**Table S5 Genetic parameters for 51 rice cultivars.**

| <b>Cultivar name</b> | <b><i>Cumtemp</i></b> | <b><i>AMIN</i></b> | <b><i>pLAI</i></b> | <b><i>P<sup>Pn</sup></i></b> | <b><i>pHI</i></b> |
|----------------------|-----------------------|--------------------|--------------------|------------------------------|-------------------|
| Annada               | 1816.9                | 0.20               | 4.04               | 0.66                         | 5.31              |
| Apo                  | 1816.9                | 0.20               | 2.92               | 0.75                         | 1.12              |
| BRRIDhan28           | 1280.6                | 0.32               | 0.00               | 0.00                         | 0.08              |
| Changyou5            | 1949.3                | 0.36               | 0.00               | 0.45                         | 0.00              |
| Dexiang4103          | 1819.4                | 0.32               | 1.44               | 3.46                         | 4.02              |
| DN425                | 1265.1                | 0.30               | 1.88               | 0.00                         | 0.16              |
| Gaoshan1             | 1580.2                | 0.37               | 1.02               | 1.01                         | 1.01              |
| GB1                  | 1820.7                | 0.24               | 2.94               | 0.00                         | 0.34              |
| HD5                  | 1886.5                | 0.29               | 1.25               | 3.00                         | 1.47              |
| HHZ                  | 1481.3                | 0.41               | 1.21               | 1.34                         | 1.17              |
| HY113                | 1777.3                | 0.33               | 0.00               | 1.64                         | 1.63              |
| HY3                  | 2013.1                | 0.26               | 1.41               | 1.30                         | 0.01              |
| HY8                  | 1871.7                | 0.34               | 0.00               | 0.05                         | 0.00              |
| IET4786              | 1413.9                | 0.33               | 2.43               | 0.01                         | 0.43              |
| IR36                 | 1700.4                | 0.24               | 2.27               | 0.01                         | 0.72              |
| IR71706              | 1393.5                | 0.28               | 0.10               | 0.00                         | 0.28              |
| IR72                 | 1669.9                | 0.28               | 0.84               | 0.00                         | 4.49              |
| Jinkeyou938          | 1957.9                | 0.30               | 2.72               | 0.35                         | 0.00              |
| Koshihikari          | 1771.9                | 0.23               | 14.51              | 0.35                         | 0.36              |
| Liangyoupeijiu       | 1909.9                | 0.34               | 7.73               | 0.00                         | 0.00              |
| Lianjing7            | 2046.7                | 0.27               | 0.18               | 3.45                         | 1.89              |
| Lingxiangyou18       | 1871.7                | 0.31               | 2.46               | 0.09                         | 0.00              |
| Lvhan1               | 1580.2                | 0.33               | 4.92               | 5.08                         | 10.00             |
| Naveen               | 1816.9                | 0.23               | 4.81               | 0.01                         | 5.84              |
| Nei5You8015          | 1378.4                | 0.58               | 0.00               | 0.01                         | 0.06              |
| Nipponbare           | 1469.1                | 0.30               | 1.63               | 0.04                         | 0.01              |
| PAU201               | 1879.2                | 0.30               | 2.18               | 0.44                         | 0.58              |
| PR113                | 1604.5                | 0.30               | 1.40               | 0.50                         | 0.88              |
| PSBRc80              | 1773.4                | 0.29               | 0.04               | 0.01                         | 0.01              |
| Pusa1509             | 2456.9                | 0.19               | 0.00               | 0.01                         | 0.01              |
| Satabdi              | 1816.9                | 0.21               | 5.64               | 2.95                         | 3.20              |
| Sensho               | 1836.2                | 0.22               | 0.00               | 0.00                         | 0.03              |
| Shendao529           | 1557.7                | 0.27               | 0.01               | 4.26                         | 8.97              |
| Shennong9765         | 1426.3                | 0.28               | 2.54               | 0.15                         | 0.01              |
| SS6                  | 1265.1                | 0.38               | 2.00               | 0.11                         | 0.64              |
| Tainan11             | 2450.2                | 0.14               | 0.00               | 0.05                         | 0.10              |
| Tainong84            | 1999.7                | 0.21               | 10.00              | 0.01                         | 0.00              |
| Tianyouhuazhan       | 1777.3                | 0.37               | 0.00               | 0.18                         | 0.00              |
| TY3618               | 1468.0                | 0.43               | 1.99               | 1.00                         | 1.02              |
| UPLRi7               | 1913.8                | 0.22               | 6.12               | 2.57                         | 0.16              |

|              |        |      |       |      |      |
|--------------|--------|------|-------|------|------|
| WFY          | 1113.8 | 0.54 | 0.00  | 0.00 | 0.06 |
| WYJ24        | 1814.1 | 0.36 | 0.01  | 0.08 | 0.01 |
| YangDao6     | 1933.1 | 0.30 | 0.84  | 1.15 | 1.08 |
| YangJing4038 | 1909.9 | 0.30 | 0.22  | 1.65 | 1.33 |
| Yixiang3724  | 1819.4 | 0.29 | 0.43  | 3.20 | 3.43 |
| YLY          | 1664.7 | 0.36 | 5.36  | 0.00 | 0.31 |
| YY2640       | 1886.5 | 0.33 | 2.26  | 3.96 | 2.65 |
| YY4949       | 1969.9 | 0.25 | 2.12  | 0.95 | 0.84 |
| ZJZ17        | 979.4  | 0.45 | 0.02  | 0.11 | 0.04 |
| ZZY          | 2096.2 | 0.32 | 0.58  | 0.94 | 0.96 |
| PR118        | 2863.8 | 0.18 | 10.00 | 0.03 | 0.01 |

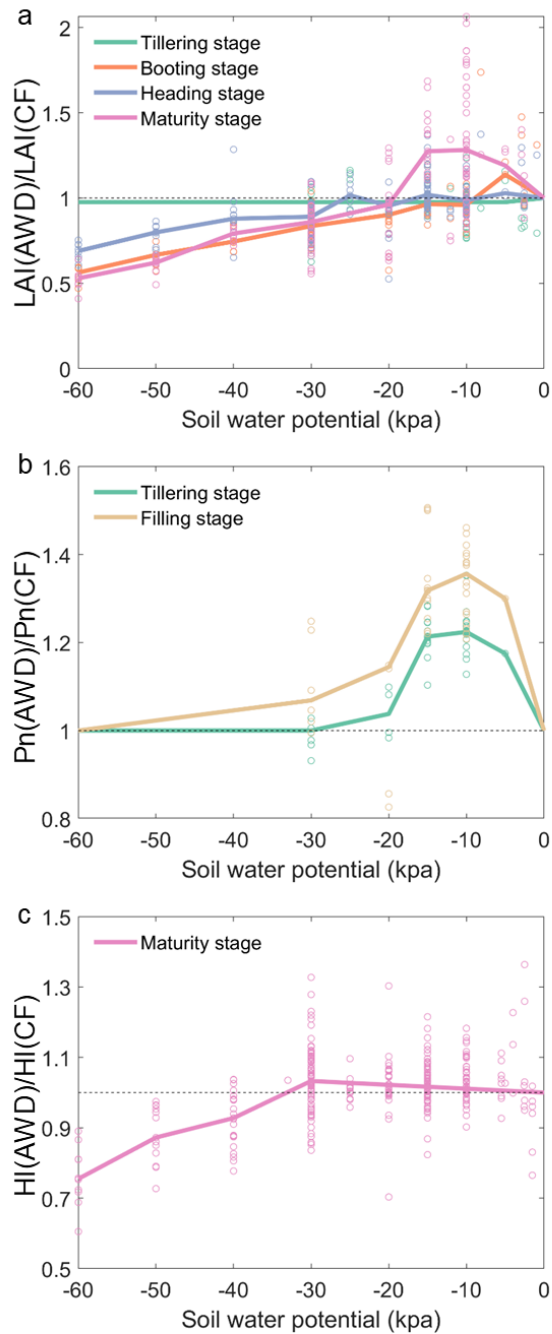

**Figure S1 Effects of non-continuous flooding on (a) leaf area index, (b) net photosynthetic rate and (c) harvest index based on experimental observations.** The dots represent ratio of physiological traits under treatment to that under control. The solid lines were derived by linear interpolation of mean observations. *LAI*, *Pn* and *HI* represent leaf area index, net photosynthetic rate and harvest index, respectively. Different color in the same subplot represent effects of different growth stages.



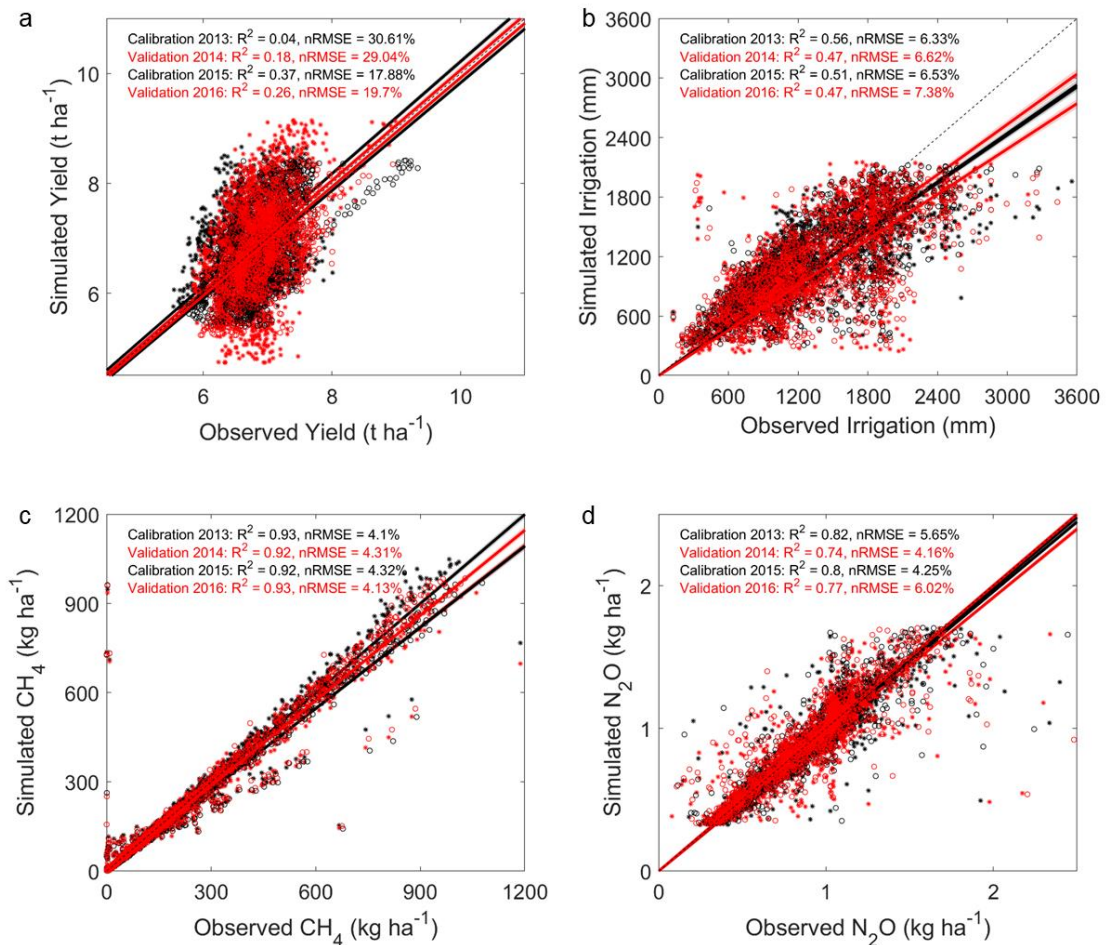

**Figure S2 Model performance in simulating spatial pattern of (a) rice yield, (b) irrigation water use, (c) methane and (d) nitrous oxide emissions under continuous flooding (baseline).** Black and red dots respectively show performance of calibration (2013 and 2015) and validation periods (2014 and 2016). The lines are the linear regression lines with shaded areas around representing the 95% confidence interval.

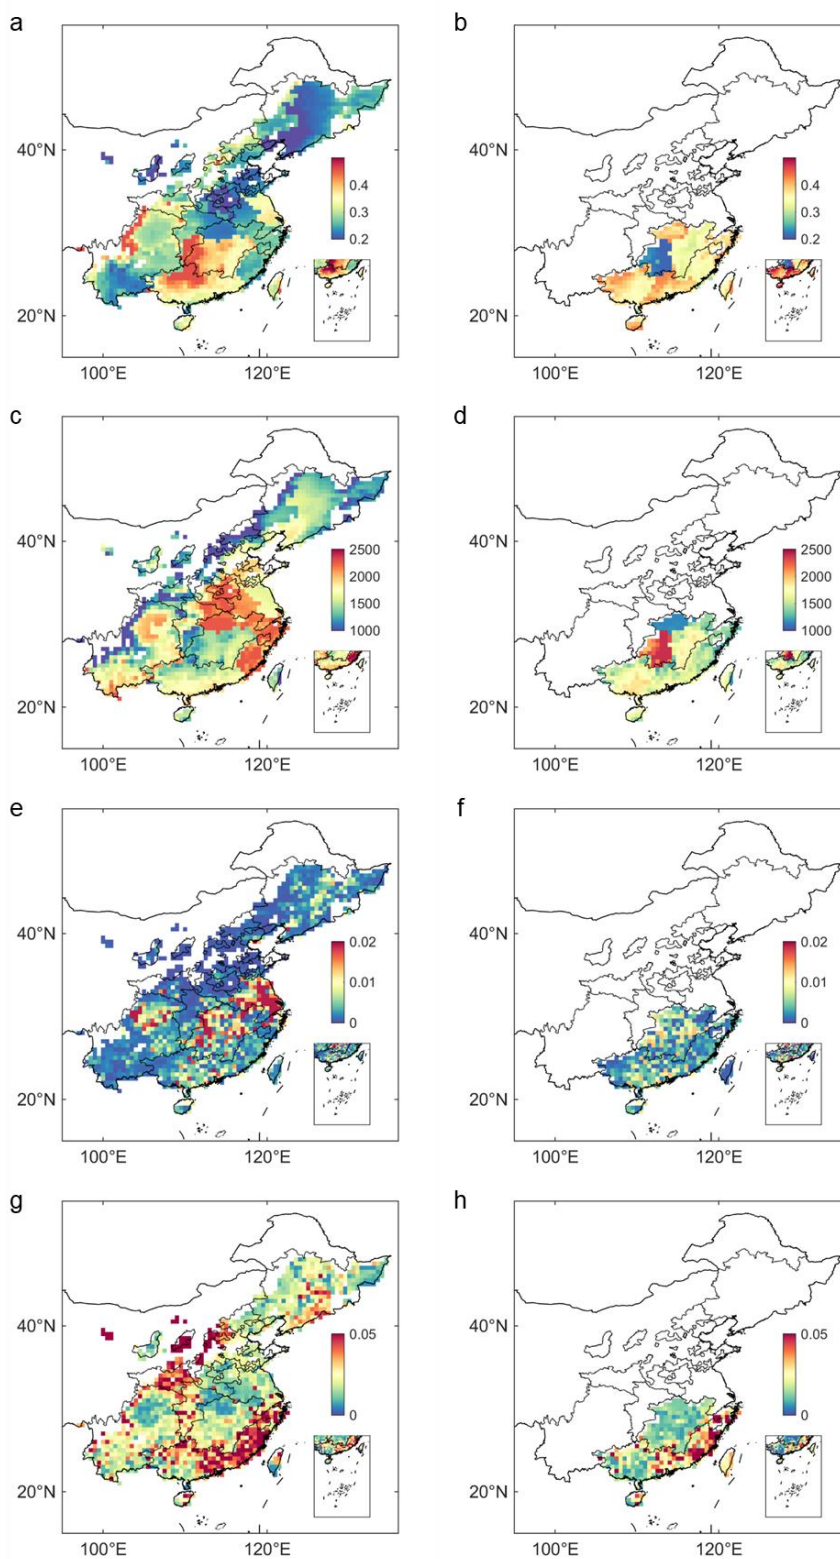

**Figure S3 Spatial pattern of model parameters under continuous flooding for the major and second rice growing season. (a-b) minimum assimilation rates per day ( $AMIN$ ). (c-d) Effective cumulative temperature for rice maturity ( $Cumtemp$ , °C). (e-f) maximum  $CH_4$  production rate per soil weight at 30 °C ( $MPmax$ ,  $g\ C\ g^{-1}\ d^{-1}$ ). (g-h) maximum portion of denitrification to  $N_2O$  production ( $f_{N_2O\_d}$ ).**

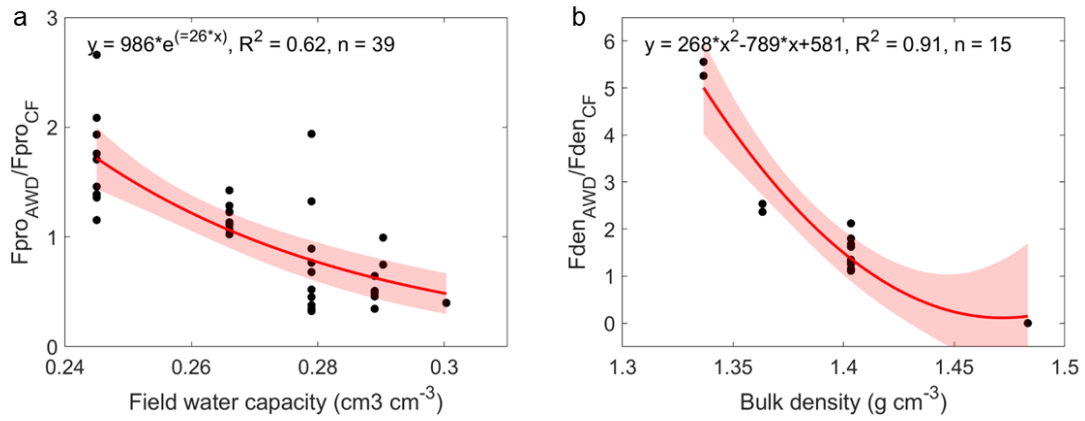

**Figure S4 Parameter transfer functions for upscaling model parameters. (a)** Relationship between field water capacity and ratio of the maximum CH<sub>4</sub> production rate per soil weight at 30 °C (*MP<sub>max</sub>*) under AWD to CF. **(b)** Relationship between field water capacity and ratio of maximum portion of denitrification to N<sub>2</sub>O production (*f<sub>N<sub>2</sub>O\_d</sub>*) under AWD to CF.

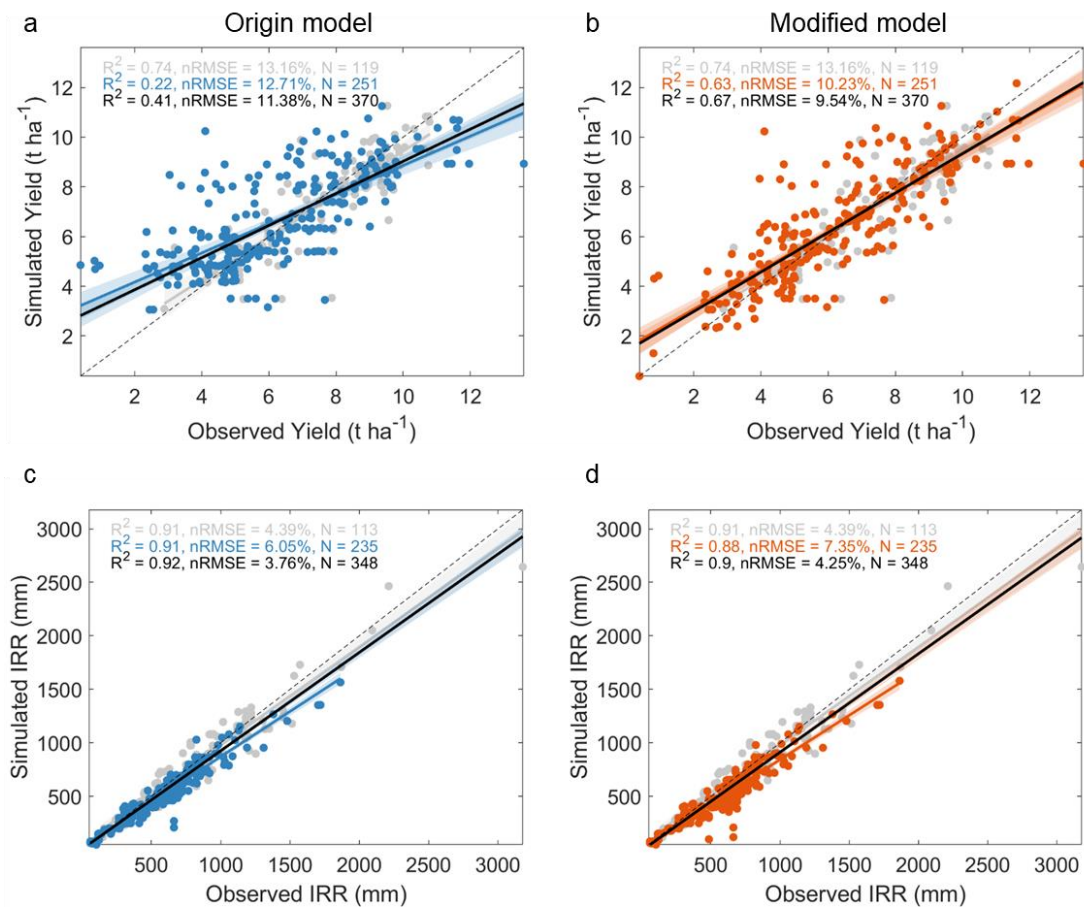

**Figure S5 Model performance in simulating rice yield (a-b) and irrigation water use (b and d) based on the origin (a, c) and modified (b, d) WHCNS model.** The solid lines are the linear regression lines with the shaded areas around each line representing the 95% confidence interval. The dashed lines are 1:1 lines. The gray color indicates results under continuous flooding conditions (CF, control). The blue and orange color indicate results under non-continuous flooding conditions (NCF, treatment) based on the origin model and modified model, respectively. The dark lines are regression lines for all records of CF and NCF conditions.

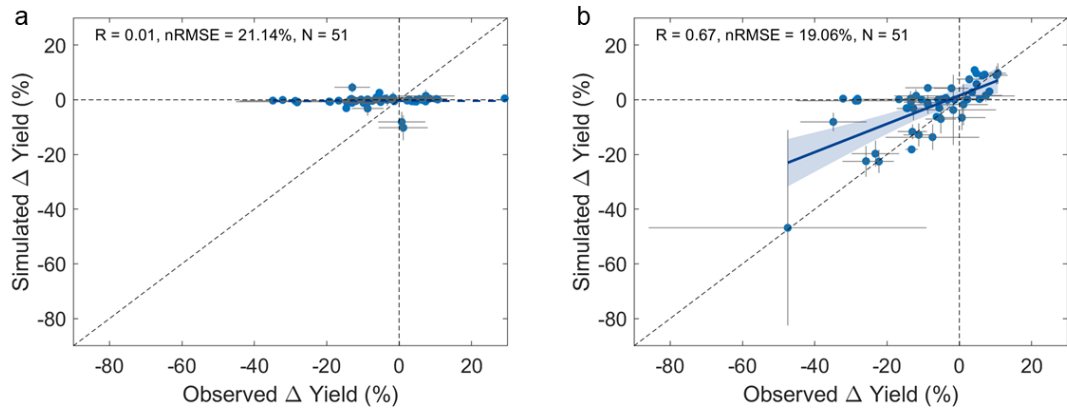

**Figure S6 Model performance in simulating cultivar differences in  $\Delta$ Yield before (a) and after (b) model modification.** The dot and error bar indicate mean and standard error of  $\Delta$ Yield for 51 rice cultivars.

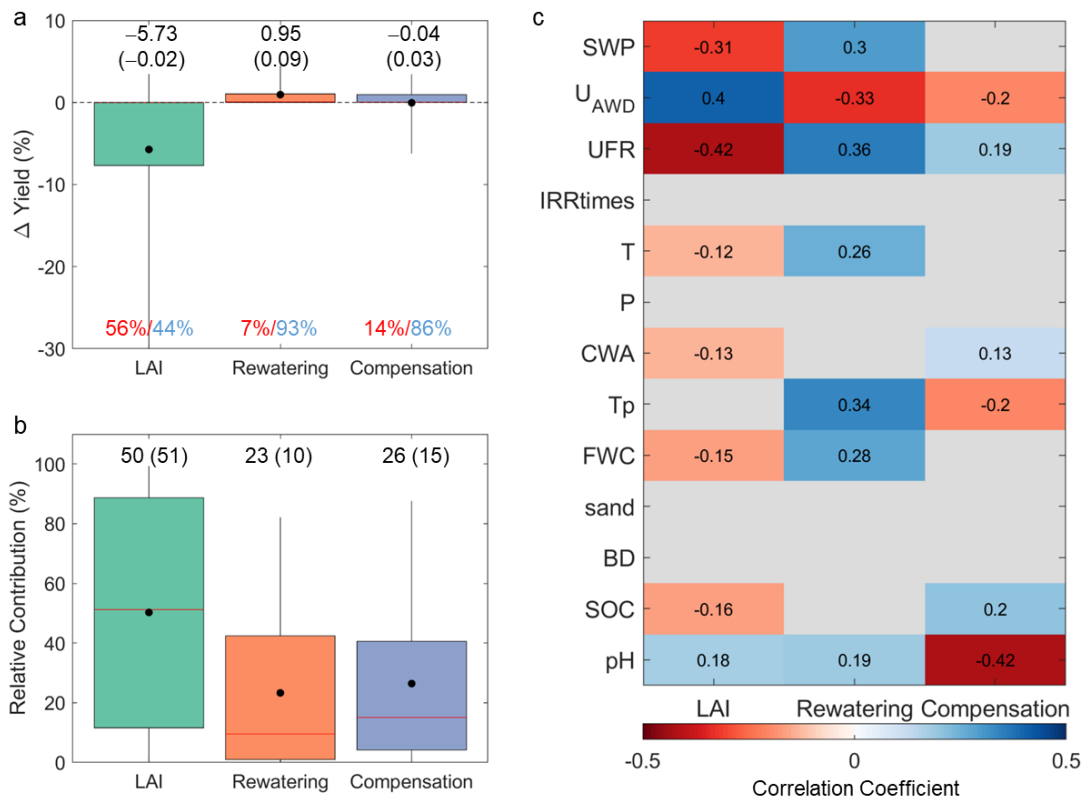

**Figure S7 Contribution of physiological processes to  $\Delta$ Yield and relationship with predictors. (a)**  $\Delta$ Yield induced by changes in leaf area expansion, rewatering effects and compensation effects. Numbers above the box indicate median (mean) values of  $\Delta$ Yield (%). Numbers below the box indicate proportion of total records with negative(red)/positive (blue) physiological effects. **(b)** Relative contributions of changes in leaf area expansion, rewatering effects and compensation effects to  $\Delta$ Yield. **(c)** Correlation coefficients between Relative contributions and environmental and management-related factors. *SWP*: Lower irrigation threshold indicated by soil water potential (kpa).  $U_{AWD}$ : Upper irrigation threshold (cm). *UFR*: Ratio of unflooded days to total growing days (%). *IRRtimes*: Irrigation times simulated by WHCNS. *T*: Mean daily growing season temperature ( $^{\circ}$ C). *P*: Cumulative precipitation of growing season (mm). *CWA*: Cumulative precipitation minus potential evapotranspiration of growing season, representing water availability (mm).  $T_p$ : Potential transpiration (mm), indicating water requirements. *FWC*: Field water capacity ( $\text{cm}^3 \text{cm}^{-3}$ ). *sand*: Soil sand content (%). *BD*: Soil bulk density ( $\text{g cm}^{-3}$ ). *SOC*: Soil organic carbon (%). *pH*: soil pH.

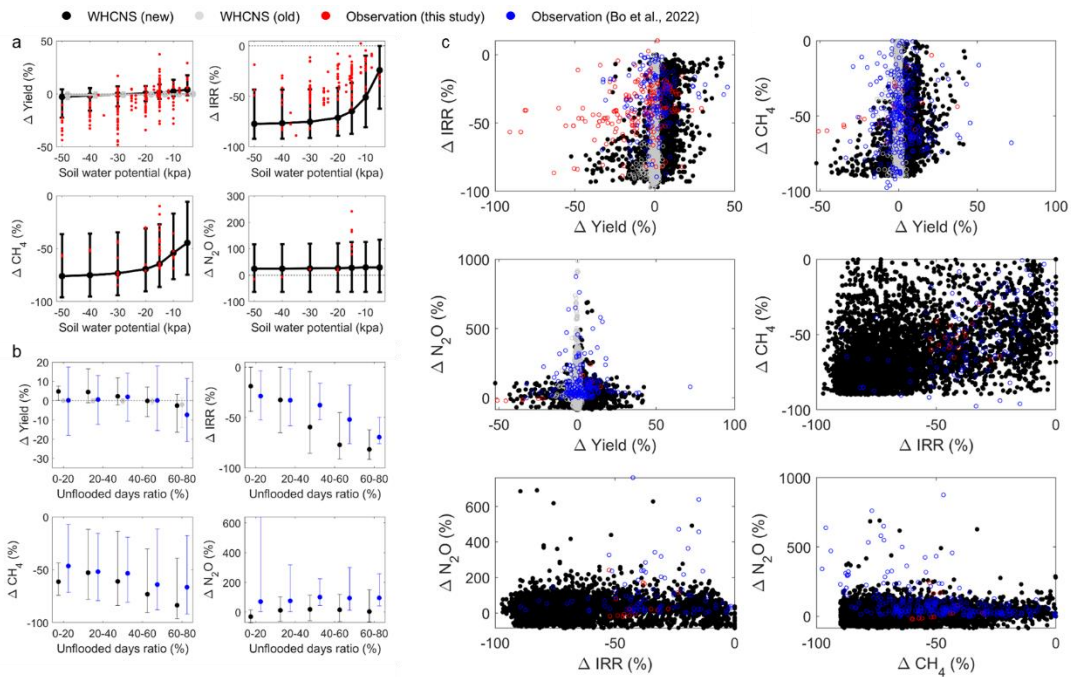

**Figure S8 Scenario simulations and comparison with observations. (a)**

Comparison of changes in rice yield, irrigation water use, CH<sub>4</sub> and N<sub>2</sub>O emissions ( $\Delta$ Yield,  $\Delta$ IRR,  $\Delta$ CH<sub>4</sub>,  $\Delta$ N<sub>2</sub>O) in responses to soil water potential. **(b)** Comparison of  $\Delta$ Yield,  $\Delta$ IRR,  $\Delta$ CH<sub>4</sub>,  $\Delta$ N<sub>2</sub>O in responses to unflooded days ratio. **(c)** Comparison of relationships between  $\Delta$ Yield,  $\Delta$ IRR,  $\Delta$ CH<sub>4</sub> and  $\Delta$ N<sub>2</sub>O. The dots indicate mean values and error bars show the 25-75<sup>th</sup> percentile range. The gray and black color indicate simulation results of the origin and modified WHCNS model, respectively. The red and blue color indicate observations compiled for this study and a previous study (Bo et al., 2022).

**Reference**

Bo, Y., Jägermeyr, J., Yin, Z., Jiang, Y., Xu, J., Liang, H., Zhou, F. (2022) Global benefits of non-continuous flooding to reduce greenhouse gases and irrigation water use without rice yield penalty. *Global Change Biology* 28, 3636-3650.

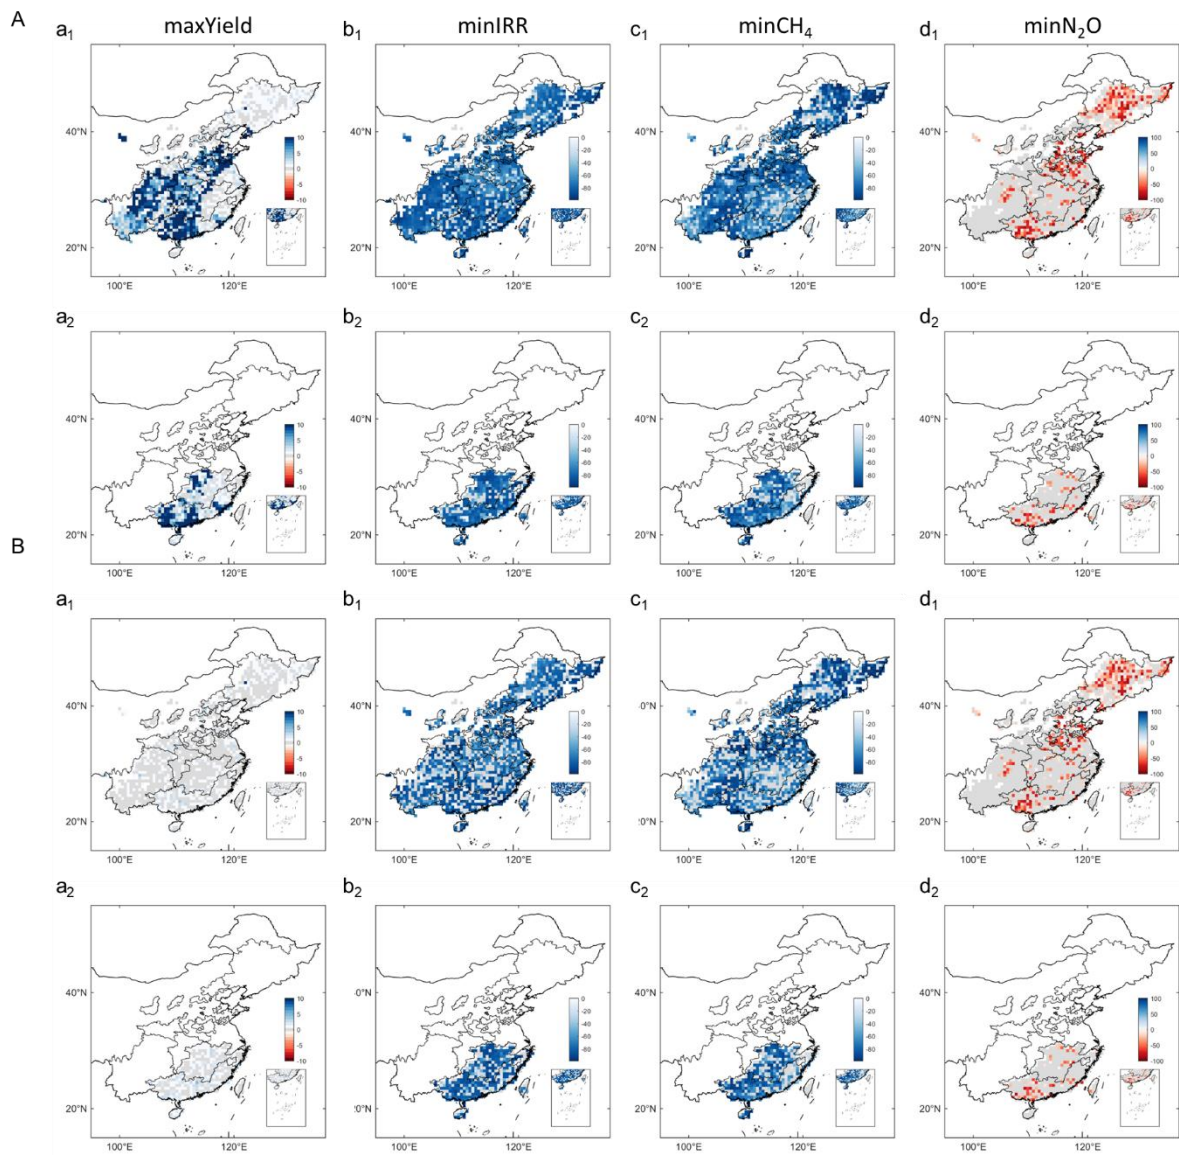

**Figure S9 Spatial pattern of NCF benefits under four optimization targets based on the origin (A) and modified (B) model.** The four columns correspond to four optimization targets, that are, maximized rice yield (*maxYield*), minimized irrigation water use (*minIRR*), minimized CH<sub>4</sub> emissions (*minCH<sub>4</sub>*) and minimized N<sub>2</sub>O emissions (*maxN<sub>2</sub>O*). The first and third rows show results for the major rice, and the second and fourth rows show results for the second rice growing season.



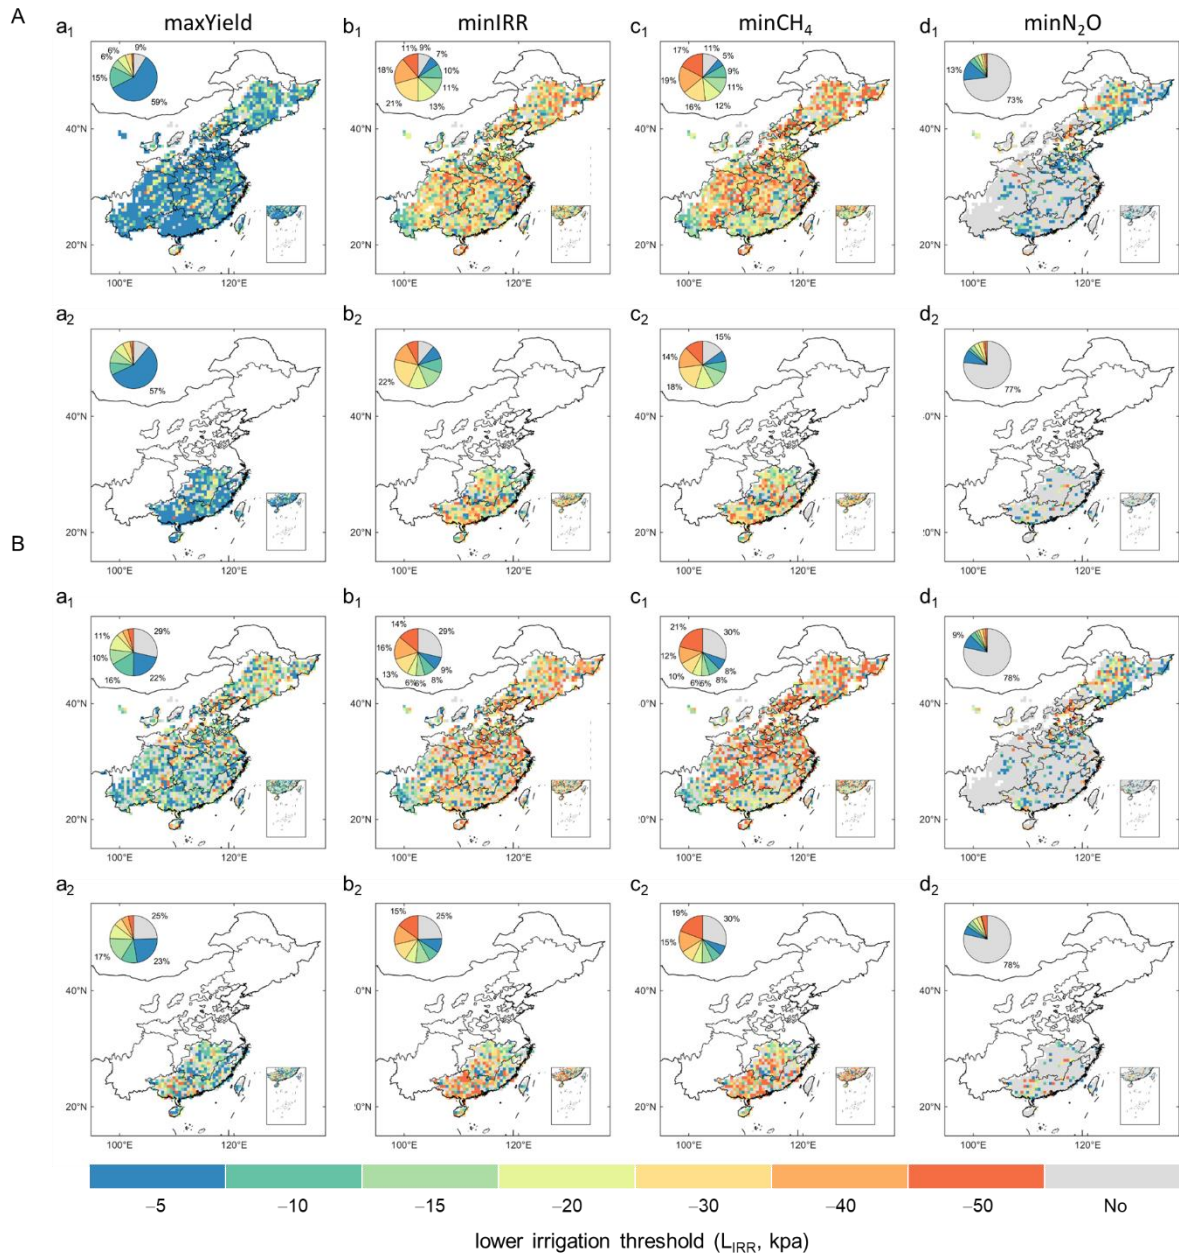

**Figure S10 Spatial pattern of lower irrigation threshold under four optimization targets based on the origin (A) and modified (B) model.** The four columns correspond to four optimization targets, that are, maximized rice yield (*maxYield*), minimized irrigation water use (*minIRR*), minimized CH<sub>4</sub> emissions (*minCH<sub>4</sub>*) and minimized N<sub>2</sub>O emissions (*maxN<sub>2</sub>O*). The first and third rows show results for the major rice, and the second and fourth rows show results for the second rice growing season. The inserted pies show proportions of rice areas with corresponding optimized lower irrigation thresholds ( $L_{IRR}$ ) to total irrigated rice areas under the four single objective targets.
